# Supplementary material
Source: PubMed Central journal article supplement (PMC2117168)
Supplement: thorax_thx.2006.067371_1.pdf [file thorax_thx.2006.067371_1.pdf]

**Appendix 1** Demographic and clinical characteristics of all patients included in the quality improvement project

| <b>Numbers included</b>                                     |                                                                         |
|-------------------------------------------------------------|-------------------------------------------------------------------------|
| <b>Number</b>                                               | 503                                                                     |
| <b>Demographics</b>                                         |                                                                         |
| <b>Sex</b>                                                  | 47% male (n = 235)                                                      |
| <b>Age</b>                                                  | Median = 74 years (range 16 to 98)<br>Age over 65 years = 71% (n = 357) |
| <b>Living in own home</b>                                   | 81.5% (n = 410)                                                         |
| <b>Living alone</b>                                         | 37% (n = 184)                                                           |
| <b>Clinical characteristics</b>                             |                                                                         |
| <b>Antibiotic from GP prior to admission</b>                | 41% (n = 175/429)                                                       |
| <b>CRP &gt;50</b>                                           | 76% (n = 341/451)                                                       |
| <b>Chest radiograph consistent with pneumonia</b>           | 93% (n = 254/273)                                                       |
| <i>Severity assessment on admission</i>                     |                                                                         |
| <b>CURB65 score</b>                                         |                                                                         |
| <b>0 or 1</b>                                               | 33% (n = 147/448)                                                       |
| <b>2</b>                                                    | 29% (n = 131/448)                                                       |
| <b>3 or more</b>                                            | 38% (n = 170/448)                                                       |
| <b>Respiratory rate ≥30/minute</b>                          | 21% (n = 97/453)                                                        |
| <b>Systolic blood pressure &lt;90mmHg</b>                   | 6% (n = 31)                                                             |
| <b>Diastolic blood pressure ≤60mmHg</b>                     | 25% (n = 126)                                                           |
| <b>Pulse ≥125/minute</b>                                    | 9.5% (n = 48)                                                           |
| <b>Pulse oximetry &lt;92% (any FiO<sub>2</sub>)</b>         | 32% (n = 160/496)                                                       |
| <b>Blood urea &gt;7mmol/l</b>                               | 58% (n = 294)                                                           |
| <b>New confusion</b>                                        | 32% (n = 160/496)                                                       |
| <b>% without co-morbidity</b>                               | 34% (n = 170)                                                           |
| <b>% with asthma/COPD</b>                                   | 34% (n = 173)                                                           |
| <i>Initial antibiotic regimen</i>                           |                                                                         |
| <b>Broad spectrum beta-lactam + macrolide</b>               | 47% (n = 236)                                                           |
| <b>Narrow spectrum beta-lactam + macrolide</b>              | 31% (n = 154)                                                           |
| <b>Beta-lactam monotherapy</b>                              | 10.5% (n = 53)                                                          |
| <b>Macrolide monotherapy</b>                                | 3% (n = 15)                                                             |
| <b>Levofloxacin</b>                                         | 2.5% (n = 13)                                                           |
| <b>Others</b>                                               | 6% (n = 32)                                                             |
| <i>Outcomes</i>                                             |                                                                         |
| <b>% of patients transferred to the intensive care unit</b> | 3% (n = 14)                                                             |
| <b>30-day post admission mortality</b>                      | 18% (n = 90)                                                            |
| <b>Length of hospital stay (excludes deaths)</b>            | Median = 6 days (range 0 to 116)                                        |
