# Supplementary material
Source: PubMed Central journal article supplement (PMC2117168)
Supplement: thorax_thx.2006.067371_2.pdf [file thorax_thx.2006.067371_2.pdf]

**Appendix 2** Demographic and clinical characteristics of the patients included in the chest radiograph cohort

| <b>Numbers included</b>                                                                                                                          |                                                                         |
|--------------------------------------------------------------------------------------------------------------------------------------------------|-------------------------------------------------------------------------|
| <b>Number included in the quality improvement project</b><br>(see Appendix 1, Thorax website)                                                    | 503                                                                     |
| <b>Number of patients with a chest radiograph reported by a consultant radiologist or respiratory physician and full data for all four tools</b> | 218                                                                     |
| <b>Demographics</b>                                                                                                                              |                                                                         |
| <b>Sex</b>                                                                                                                                       | 49% male (n = 107)                                                      |
| <b>Age</b>                                                                                                                                       | Median = 73 years (range 16 to 97)<br>Age over 65 years = 62% (n = 136) |
| <b>Living in own home</b>                                                                                                                        | 86% (n = 188)                                                           |
| <b>Living alone</b>                                                                                                                              | 29% (n = 63)                                                            |
| <b>Clinical characteristics</b>                                                                                                                  |                                                                         |
| <b>Antibiotic from GP prior to admission</b>                                                                                                     | 39% (n = 75/191)                                                        |
| <b>CRP &gt;50</b>                                                                                                                                | 79% (n = 154/196)                                                       |
| <b>Severity assessment on admission</b>                                                                                                          |                                                                         |
| <b>CURB65 score</b>                                                                                                                              |                                                                         |
| <b>0 or 1</b>                                                                                                                                    | 39% (n = 85)                                                            |
| <b>2</b>                                                                                                                                         | 25% (n = 54)                                                            |
| <b>3 or more</b>                                                                                                                                 | 36% (n = 79)                                                            |
| <b>Respiratory rate ≥30/minute</b>                                                                                                               | 26% (n = 56)                                                            |
| <b>Systolic blood pressure &lt;90mmHg</b>                                                                                                        | 6% (n = 13)                                                             |
| <b>Diastolic blood pressure ≤60mmHg</b>                                                                                                          | 25% (n = 54)                                                            |
| <b>Pulse ≥125/minute</b>                                                                                                                         | 11% (n = 23)                                                            |
| <b>Pulse oximetry &lt;92% (any FiO<sub>2</sub>)</b>                                                                                              | 34% (n = 74)                                                            |
| <b>Blood urea &gt;7mmol/l</b>                                                                                                                    | 55% (n = 120)                                                           |
| <b>New confusion</b>                                                                                                                             | 27% (n = 58)                                                            |
| <b>% without co-morbidity</b>                                                                                                                    | 37% (n = 81)                                                            |
| <b>% with asthma/COPD</b>                                                                                                                        | 38.5% (n = 84)                                                          |
| <b>Initial antibiotic regimen</b>                                                                                                                |                                                                         |
| <b>Broad spectrum beta-lactam + macrolide</b>                                                                                                    | 52% (n = 114)                                                           |
| <b>Narrow spectrum beta-lactam + macrolide</b>                                                                                                   | 30% (n = 66)                                                            |
| <b>Beta-lactam monotherapy</b>                                                                                                                   | 8% (n = 18)                                                             |
| <b>Macrolide monotherapy</b>                                                                                                                     | 1.5% (n = 3)                                                            |
| <b>Levofloxacin</b>                                                                                                                              | 2% (n = 4)                                                              |
| <b>Others</b>                                                                                                                                    | 6% (n = 13)                                                             |
| <b>Outcomes</b>                                                                                                                                  |                                                                         |
| <b>% of patients transferred to the intensive care unit</b>                                                                                      | 3% (n = 7)                                                              |
| <b>30-day post admission mortality</b>                                                                                                           | 14% (n = 30)                                                            |
| <b>Length of hospital stay (excludes deaths)</b>                                                                                                 | Median = 5 days (range 0 to 59)                                         |
