# Supplementary material
Source: PubMed Central journal article supplement (PMC2117168)
Supplement: thorax_thx.2006.067371_3.pdf [file thorax_thx.2006.067371_3.pdf]

**Appendix 3** Operating characteristics of CURB65, CRB65, SIRS criteria used in four different ways and SEWS for the chest radiograph defined cohort

| Severity                                                     | Mortality    | Sensitivity | Specificity | PPV   | NPV   |
|--------------------------------------------------------------|--------------|-------------|-------------|-------|-------|
| <b>CURB65</b>                                                |              |             |             |       |       |
| CURB65 = 0                                                   | 0/37 (0%)    | 100%        | 0%          | 14%   | NC    |
| CURB65 = 1                                                   | 1/48 (2%)    | 100%        | 20%         | 17%   | 100%  |
| CURB65 = 2                                                   | 8/54 (15%)   | 97%         | 45%         | 22%   | 99%   |
| CURB65 = 3                                                   | 10/51 (20%)  | 70%         | 69%         | 27%   | 93.5% |
| CURB65 = 4                                                   | 9/24 (37.5%) | 23%         | 91%         | 29%   | 88%   |
| CURB65 = 5                                                   | 2/4 (50%)    | 7%          | 99%         | 50%   | 87%   |
| <b>CRB65</b>                                                 |              |             |             |       |       |
| CRB65 = 0                                                    | 0/47 (0%)    | 100%        | 0%          | 14%   | NC    |
| CRB65 = 1                                                    | 8/75 (11%)   | 100%        | 25%         | 17.5% | 100%  |
| CRB65 = 2                                                    | 10/62 (16%)  | 73%         | 61%         | 23%   | 93%   |
| CRB65 = 3                                                    | 10/30 (33%)  | 40%         | 88%         | 35%   | 90%   |
| CRB65 = 4                                                    | 2/4 (50%)    | 7%          | 99%         | 50%   | 87%   |
| <b>SIRS used in four different ways</b>                      |              |             |             |       |       |
| No SIRS <sup>1</sup>                                         | 10/62 (16%)  | 100%        | 0%          | 14%   | NC    |
| SIRS                                                         | 5/110 (4.5%) | 67%         | 28%         | 13%   | 84%   |
| Severe sepsis/septic shock                                   | 15/46 (33%)  | 50%         | 83.5%       | 33%   | 91%   |
| SIRS = 0 <sup>2</sup>                                        | 4/18 (22%)   | 100%        | 0%          | 14%   | NC    |
| SIRS = 1                                                     | 6/44 (14%)   | 87%         | 7%          | 13%   | 78%   |
| SIRS = 2                                                     | 9/67 (13%)   | 67%         | 28%         | 13%   | 84%   |
| SIRS = 3                                                     | 10/60 (17%)  | 37%         | 58.5%       | 12%   | 85%   |
| SIRS = 4                                                     | 1/29 (3%)    | 3%          | 85%         | 3%    | 85%   |
| SIRS = 0 <sup>3</sup>                                        | 4/18 (22%)   | 100%        | 0%          | 14%   | NC    |
| SIRS = 1                                                     | 6/44 (14%)   | 87%         | 7%          | 13%   | 78%   |
| SIRS = 2                                                     | 2/47 (4%)    | 67%         | 28%         | 13%   | 84%   |
| SIRS = 3                                                     | 3/41 (7%)    | 60%         | 52%         | 16.5% | 89%   |
| SIRS = 4                                                     | 0/22 (0%)    | 50%         | 72%         | 22%   | 90%   |
| Severe sepsis/septic shock                                   | 15/46 (33%)  | 50%         | 83.5%       | 33%   | 91%   |
| No SIRS or hypotension/<br>organ hypo-perfusion <sup>4</sup> | 4/43 (9%)    | 100%        | 0%          | 14%   | NC    |
| SIRS                                                         | 5/110 (4.5%) | 87%         | 21%         | 15%   | 91%   |
| Hypotension and/or<br>organ hypo-perfusion, but<br>no SIRS   | 6/19 (32%)   | 70%         | 77%         | 32%   | 94%   |
| Severe sepsis/septic<br>shock                                | 15/46 (33%)  | 50%         | 83.5%       | 33%   | 91%   |
| <b>SEWS</b>                                                  |              |             |             |       |       |
| SEWS = 0                                                     | 2/23 (9%)    | 100%        | 0%          | 14%   | NC    |
| SEWS = 1                                                     | 3/29 (10%)   | 93%         | 11%         | 14%   | 91%   |
| SEWS = 2                                                     | 6/39 (15%)   | 83%         | 25%         | 15%   | 90%   |
| SEWS = 3                                                     | 3/39 (8%)    | 63%         | 42.5%       | 15%   | 62%   |
| SEWS = 4                                                     | 3/33 (9%)    | 53%         | 62%         | 18%   | 89%   |
| SEWS = 5                                                     | 4/23 (17%)   | 43%         | 78%         | 24%   | 90%   |
| SEWS ≥ 6                                                     | 9/32 (28%)   | 30%         | 88%         | 28%   | 89%   |

NC = Not calculable

1. Defined as in Table 1, main paper

2. Defined by presence or absence of: temperature <36°C or >38°C, pulse >90/minute, respiratory rate >20/minute and white cell count <4 or >12 cells per mm<sup>3</sup>

3. Defined by above plus definition of severe sepsis/septic shock given in Table 1, main paper

4. New definition (see results section, main paper)
