# Supplementary material
Source: PubMed Central journal article supplement (PMC2117168)

## Appendix 4 Receiver operating curve (ROC) for each prognostic tool, chest radiograph defined cohort

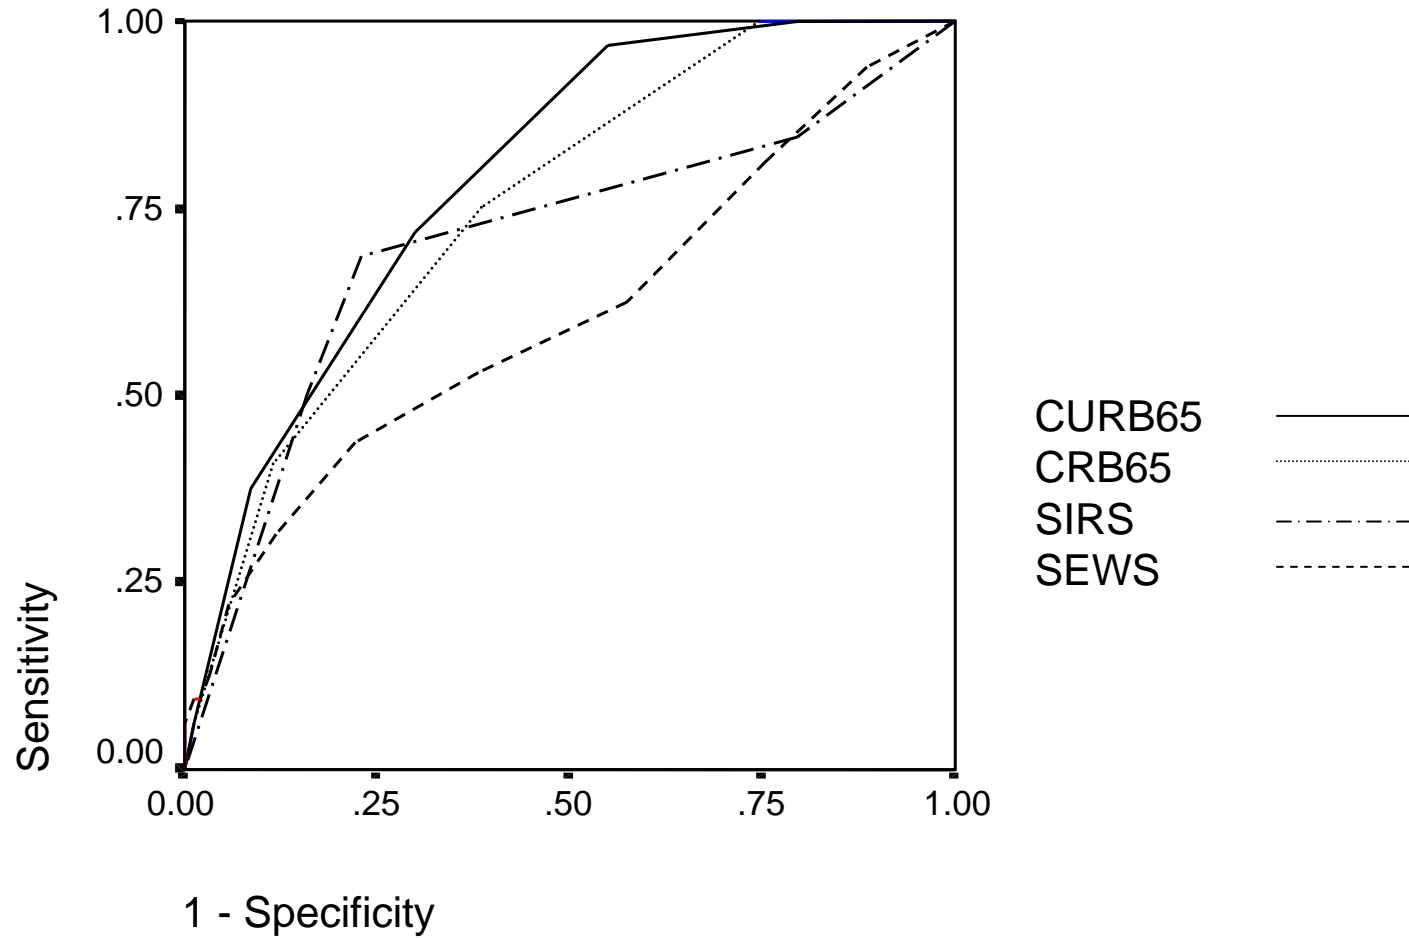

Supplement: thorax_thx.2006.067371_4.pdf [file thorax_thx.2006.067371_4.pdf]
