# Supplementary material
Source: PubMed Central journal article supplement (PMC2117168)
Supplement: thorax_thx.2006.067371_5.pdf [file thorax_thx.2006.067371_5.pdf]

# The CURB65 pneumonia severity score outperforms generic sepsis and early warning scores in predicting mortality in community-acquired pneumonia

Gavin Barlow<sup>1</sup>, Consultant Physician in Infectious Diseases/Medicine

Dilip Nathwani<sup>2</sup>, Consultant Physician in Infectious Diseases/Medicine and Professor of Infectious Diseases

Peter Davey<sup>3</sup>, Professor of Pharmacoeconomics and Consultant Physician in Infectious Diseases/Medicine

Deleted: <sup>2</sup>

1. Castle Hill Hospital, Hull & East Yorkshire Hospitals NHS Trust, Cottingham, East Yorkshire
2. Ninewells Hospital and Medical School, Tayside University Hospitals NHS Trust, Dundee
3. Health Informatics Centre, University of Dundee, Dundee

**Keywords:** CURB65, pneumonia, mortality, sepsis, early, warning

Deleted:

Deleted:

**Word count:** 2682

## Correspondence to:

Dr. Gavin Barlow  
Consultant in Infectious Diseases/Medicine  
Dept. of Infection & Tropical Medicine  
Castle Hill Hospital  
Hull & East Yorkshire Hospitals NHS trust  
Cottingham  
East Yorkshire  
HU16 5JQ

Deleted: t

**Phone:** 01482 875875 ext. 2267 at Castle Hill Hospital

**E-mail:** [Gavin.Barlow@hey.nhs.uk](mailto:Gavin.Barlow@hey.nhs.uk)

## Abstract

### Background

The performance of CURB65 in predicting mortality in community-acquired pneumonia (CAP) has been tested in two large observational studies. It has not been tested, however, against generic sepsis and early warning scores, which are increasingly being advocated for identification of high risk patients in acute medical wards.

### Method

A retrospective analysis was performed of data prospectively collected for a CAP quality improvement study. The ability to stratify mortality and performance characteristics (sensitivity, specificity, positive predictive value (PPV), negative predictive value (NPV) and area under the receiver operating curve (AUC)) were calculated for stratifications of CURB65, CRB65, the systemic inflammatory response syndrome (SIRS) criteria and the Standardised Early Warning Score (SEWS).

Deleted: , overall accuracy

Deleted:

Deleted: cottish

### Results

Four hundred and nineteen patients were included in the main analysis with a median age of 74 years (male sex = 47%). CURB65 and CRB65 stratified mortality in a more clinically useful way and had more favourable operating characteristics than SIRS or SEWS. For example, mortality in low risk patients was 2% when defined by CURB65, but 9% when defined by SEWS and 11% to 17% when defined by variations of the SIRS criteria. The sensitivity, specificity, PPV and NPV of CURB65 was 71%, 69%, 35% and 91%, respectively, versus 62%, 73%, 35% and 89% for the best performing version of SIRS and 52%, 67%, 27% and 86% for SEWS. CURB65 had the greatest AUC (0.78 versus 0.73 for CRB65, 0.68 for SIRS and 0.64 for SEWS).

Deleted:

Deleted: ,

Deleted: and accuracy

Deleted: ,

Deleted: and 70%

Deleted:

Deleted: ,

Deleted: and 71%

Deleted: ,

Deleted: and 64%

Deleted: 2

Deleted: ,

Deleted: .¶

### Conclusions

CURB65 should not be supplanted by SIRS or SEWS for initial prognostic assessment in CAP. Further research to identify better generic prognostic tools is required.

## Introduction

Deleted: ¶

Community-acquired pneumonia (CAP) is an important quality improvement target in acute medicine<sup>1</sup>. Recent major national and specialist society CAP guidelines suggest the use of prognostic (severity) assessment in guiding clinical decisions about the level of intervention required<sup>2-5</sup>. The British Thoracic Society<sup>2</sup> (BTS), Infectious Diseases Society of America<sup>3</sup> (IDSA) and Canadian Thoracic Society<sup>4</sup> guidelines all recommend the use of validated prognostic tools<sup>6,7</sup> on admission to hospital as adjuncts to clinical judgement in guiding the management of patients with CAP. The Pneumonia Severity Index (PSI) has been used to identify low risk patients who can be managed equally effectively at home or as inpatients<sup>8-10</sup>.

Deleted: All of the

In the United Kingdom (UK), the BTS guidelines promote the use of CURB65<sup>7</sup>, which is based on four bedside and one laboratory based prognostic markers (see Table 1). This tool, which is an evolution of two previously validated prognostic rules<sup>11,12</sup>, was shown to have 75% sensitivity and 75% specificity for predicting death at 30 days in CAP in the validation set of a large prospective multi-centre, multi-national derivation/validation study<sup>7</sup>.

CRB65, which does not require a blood urea level, was shown to stratify mortality similarly, but had inferior performance characteristics. There is evidence that junior doctors, however, have poor awareness of the BTS recommendations. In a survey of 83 junior and middle grade doctors, only 4% could correctly state all four prognostic markers of the BTS CURB tool<sup>13</sup>. Woodhead suggested that the use of a generic rather than a pneumonia specific predictive tool might be easier for doctors to remember and use in the clinical management of patients<sup>14</sup>.

Ewing et al have previously compared the performance of CURB, the precursor of CURB65, with that of the PSI, the modified American Thoracic Society (ATS) rule for predicting the need for intensive care unit admission, and the American College of Chest Physicians-Society of Critical Care Medicine's definition of sepsis<sup>15</sup>. The ATS rule performed the best with the PSI and CURB having similar performance characteristics. More recently, when compared to the PSI, CURB65 was shown to have equivalent

performance<sup>16</sup>. CURB65 has not been compared, however, with generic sepsis or early warning scores. The study reported in this paper, compared the performance of CURB65 and CRB65 in predicting death with that of two commonly used generic scores, the systemic inflammatory response syndrome (SIRS) and the Standardised Early Warning Score (SEWS) (Table 1). SIRS is recognised worldwide as a component of the definition of sepsis<sup>17</sup>. It is often used to define and stratify sepsis in research<sup>18</sup>, and has been incorporated in to our and other hospitals' sepsis guidelines. SEWS<sup>19</sup> is a modified version of an Early Warning Score (EWS)<sup>20</sup>, which is increasingly been advocated for use in the acute medical environment to guide the intensity of nursing observation and medical management<sup>20-22</sup>. Our hypothesis was that SIRS and SEWS would perform at least as well, or better, than CURB65 and CRB65 in predicting mortality in CAP.

Deleted: here

Deleted: cottish

Deleted: see

Deleted: <sup>5</sup>

Deleted: <sup>6</sup>

Deleted: <sup>7</sup>

Deleted: the Medical

Deleted: M

Deleted: <sup>18</sup>

Deleted: <sup>18</sup>

Deleted:

## Methods

A retrospective analysis of prospectively collected data was performed. The data used were collected as part of a controlled before and after study over two winter periods (November to April 2001/02 and 2002/03) to evaluate the implementation of a quality improvement programme to improve the delivery and appropriateness of antibiotic prescribing for hospitalised patients with CAP<sup>23</sup>. Potential subjects were identified, by review of admission records from two hospitals, one a 1000-bed teaching hospital and the other a 500-bed district general hospital. Patients were included if they were receiving antibiotics for a suspected lower respiratory tract infection and had either a new infiltrate on the chest radiograph or been clinically diagnosed as having CAP by a specialist registrar or consultant physician. Patients were excluded if they had one or more of the following criteria: 1. a non-pneumonia diagnosis; 2. aspiration, hypostatic or hospital-acquired pneumonia; 3. the initial diagnosis of CAP was changed prior to discharge from hospital; 4. the patient was HIV-positive, neutropenic ( $<1.0 \times 10^9/l$ ) secondary to chronic illness or therapy, or significantly immunosuppressed (long term (>2 weeks) prednisolone (or equivalent) of  $\geq 10mg$  or immunosuppressive therapy such as methotrexate, azathioprine, mycophenolate, etc.); 5. progressive malignancy;

Formatted: Normal, Tabs:  
Not at 14.2 pt

Deleted: ¶

Deleted: S

Deleted: recruited

Deleted: prospectively

Deleted: 2

Deleted: 3

Deleted: 4

6, the patient had chronic respiratory disease other than asthma or chronic obstructive pulmonary disease; 7, age <16 years old.

Deleted: 5

Deleted: bronchitis

Deleted: 6

Demographic, clinical and outcomes data were collected using a pre-piloted data collection form. The criteria used to establish the CURB65, CRB65, SIRS and SEWS scores were taken from the earliest recorded reading/result in the patients medical/nursing records (i.e. on admission to hospital). Patients were reviewed on alternate days until discharge from hospital or death. Deaths after discharge, but within 30 days of admission to hospital were established by hospital computer database. Data were subsequently audited and double entered into an Epi-Info database (Centers for Disease Control (CDC), Atlanta and World Health Organisation (WHO), Geneva). Statistical analyses were performed using SPSS for Windows (version 10). Descriptive statistics are given as medians or percentages with 95% confidence intervals (CI) where appropriate. Sensitivity, specificity, positive predictive value (PPV), negative predictive value (NPV) and accuracy were calculated for stratifications of the four tools. A receiver operator curve (ROC) was produced for each tool. The area under the curve (AUC) for each of these and associated standard errors (SE) and 95% CI were also calculated. The definitions of the above performance characteristics are given in Table 2<sup>24,25</sup>

Deleted: means,

Deleted: and

Deleted: three

Deleted: of the rules.

Deleted:

The definitions of each of the four tools are shown in Table 1. Severity was defined according to how one would expect to use the tools in clinical practice. For CURB65, therefore, severe CAP was defined as a score of 3 or greater<sup>7</sup>. For CRB65, severe CAP was defined as a score of 3 or 4 as suggested by the findings of Lim et al<sup>7</sup>. For SEWS, severe CAP was defined as a score of 4 or greater as it is at this level of score that the SEWS chart recommends early intervention by a doctor<sup>19</sup>. We did not include a urine output score in the calculation of SEWS. SIRS was analysed in four different ways to establish the best performing variation of this tool and the most appropriate cut-offs to define severe CAP. For SIRS, hypotension was defined as a systolic blood pressure <90 mmHg. Organ hypo-perfusion was defined as new confusion (MSQ  $\leq$ 8/10 or a 2 point drop in MSQ). We did not attempt to separate patients with severe sepsis from those with septic shock as, by

Deleted: three

Deleted: <sup>7</sup>

definition, septic shock cannot be diagnosed on admission to hospital until the patient has received adequate intravenous fluid resuscitation. We have therefore assumed that patients who went on to be diagnosed with septic shock shortly after admission are embedded in the cohort of patients with severe sepsis.

## Results

Of the 503 patients (a description of the whole cohort is provided in Appendix 1, Thorax website) included in the quality improvement study, full data for all four tools were available for 419 patients (83%). Descriptive statistics for this cohort of patients are shown in Table 3, Reasons for exclusion from the original quality improvement study have previously been published<sup>23</sup>. Most deaths occurred within the first week of admission (72%) with 14% occurring in the second week and the remainder (14%) between 15 and 30 days.

Mortality for severity stratifications of the four tools and associated sensitivity, specificity, PPV and NPV are shown in Table 4. Based on the results of these analyses, for SIRS, we defined severe CAP as the presence of hypotension and/or organ hypo-perfusion without SIRS or severe sepsis/septic shock (Table 4).

CURB65 and CRB65 were the only tools that identified a genuinely low risk group of patients (2% in CURB65 = 0 or 1 patients versus 0% in CRB65 = 0 patients versus 9% in the SEWS = 0 or 1 patients and 11% in patients without SIRS or hypotension or hypo-perfusion). The receiver operating curves are shown in Figure 1. The ROC for CURB65 had the greatest AUC (0.78, SE 0.025, 95% CI 0.73 to 0.83) followed by CRB65 (0.73, SE 0.029, 95% CI 0.67 to 0.79), SIRS (0.68, SE 0.035, 95% CI 0.61 to 0.75) and SEWS (0.64, SE 0.035, 95% CI 0.57, to 0.70). The overall accuracy of the four tools was 70% for CURB65, 79.5% for CRB65 (62% for a cut-off of  $\geq 2$  for severe CAP; see later discussion), 71% for SIRS and 64% for SEWS.

Sub-group analyses were performed on patients who had a chest radiograph reported by a consultant radiologist or seen by a consultant respiratory physician with associated documentation in the patient's case-notes (n = 218).

Deleted: three

Deleted: 2

Deleted: each

Deleted: three

Deleted: 3

Deleted: with or

Deleted: 3

Deleted: was

Deleted: the

Deleted: 6

Deleted: 2

Deleted: 4

Deleted: 5

Deleted: 69

Deleted: (i.e. the ratio of the number of patients correctly identified as being severe and non-severely ill to the total number of patients)

Deleted: three

The characteristics of this cohort are shown in Appendix 2, Thorax website. The operating characteristics of the four tools in this cohort of patients are shown in Appendix 3, Thorax website. The ROC is shown in Appendix 4, Thorax website. As for the main analyses, CURB65 and CRB65 were the only tools to identify a low risk cohort of patients. In contrast to the main analyses, SIRS (as defined above) performed better than CURB65 with respect to sensitivity, specificity, PPV, NPV and accuracy. The ROC for CURB65 still had the greatest AUC (0.79, SE 0.037, 95% CI 0.72 to 0.86), however, followed by CRB65 (0.75, SE 0.043, 95% CI 0.67 to 0.83), SIRS (0.70, SE 0.057, 95% CI 0.59 to 0.81) and SEWS (0.61, SE 0.059, 95% CI 0.49 to 0.72). The overall accuracy of the four tools in this new cohort was 69% for CURB65, 86% for CRB65 (62% for a cut-off of  $\geq 2$  for severe CAP; see later discussion), 76% for SIRS and 61% for SEWS. Table 5 compares the results of this study with two previously reported validation studies.

Formatted: Font: Not Bold

## Discussion

Severity assessment is the key to appropriately managing patients with CAP. The results of this study show that two potential generic prognostic tools, SIRS and SEWS, should not be used in preference to CURB65 or CRB65 for predicting mortality in adult patients who present to hospital with CAP. CURB65 and CRB65 outperform both of these tools in two ways. Firstly, and most importantly, their stratification of mortality is more clinically useful and identifies a genuinely low risk group of patients, whereas SIRS and SEWS do not. This means that CURB65 and CRB65 can be used to identify patients who do not require inpatient care unless they have additional co-morbidities or signs of respiratory failure<sup>8-10</sup>. Secondly, they performed better with regard to most of the other performance criteria (except when compared to our modified definition of SIRS in the chest radiograph defined cohort) and had the greatest AUC in all analyses. It is worth noting, however, that none of the tools performed particularly well and all were well below the standard required of population screening tests. This emphasises the importance of combining predictive tools with clinical judgement.

Deleted: s

Deleted: it's

Deleted:

Deleted: , in particular, it

Deleted:

Deleted: CURB65

Deleted: , in particular,

The ease of using each tool in clinical practice should also be considered. CURB65 requires four bed-side and one laboratory criteria. Although the latter may delay a full assessment on admission to hospital, Lim et al have previously shown that CRB65 stratifies mortality similarly and can therefore be used whilst awaiting the urea result<sup>7</sup>. In contrast to the conclusions of Lim et al, however, the results of our study suggest that a CRB65 score of two or more would be a safer cut-off for defining CAP. SIRS requires three bed-side and one laboratory criteria plus an assessment of hypotension and hypo-perfusion. Although SEWS requires the most data, all criteria can be measured at the bed-side. It does require the availability of a pulse oximeter, however, and accurate measurement of urine output over a 3 hour period (see discussion later).

This is now the third published study to assess the predictive performance of CURB65 in CAP<sup>7,16</sup>. CURB65 stratified mortality similarly across all three studies (Table 5). Importantly, mortality in the two least severe stratifications (i.e. 0 and 1) was similar (2%, 1.2% and 0.4%, respectively) thereby confirming that CURB65 can safely identify a low risk cohort of patients. The overall higher mortality seen in our study is likely to reflect the characteristics of the study cohort, in particular, the older median age (74 years versus 69 years in the derivation/validation study and the greater proportion of patients with severe CAP: 38% versus 29%<sup>7</sup>). The sensitivity, specificity, PPV and NPV were also similar. In our study these values were 71%, 69%, 35% and 91% versus 68%, 75%, 22% and 96% in the validation set and 75%, 75%, 23% and 97% in the derivation set of the validation/derivation study<sup>7</sup>.

Deleted: confirm

Deleted: In our study, mortality across the six stratifications of the rule (0 to 5 criteria) was 0%, 3.6%, 17%, 26%, 55% and 33%. In the original derivation/validation study of 932 acute medical emergency patients, mortality was 0.6%, 1.6%, 9%, 16%, 36% and 20%, respectively<sup>7</sup>. In a recent Spanish study of 1100 inpatients and 676 outpatients, mortality was 0%, 1%, 7.6%, 21%, 42% and 60% across the six stratifications<sup>21</sup>. CURB65 therefore

Deleted: our

Deleted: of patients

CURB65 has recently been found to have similar performance to the PSI (AUC 0.87 versus 0.89) in predicting 30-day mortality in CAP<sup>16</sup>, but is yet to be compared to the modified ATS criteria<sup>26</sup>. Ewig et al recently compared both of these with the old BTS tool (CURB) and found that the modified ATS criteria performed the best in predicting mortality and the need for admission to an intensive care unit (ITU)<sup>15</sup>. The performance of CURB and the PSI were comparable. Interestingly, when severe sepsis was used as the cut-off for severity in this study, it had better sensitivity (89% versus 51%), PPV (20%

Deleted: <sup>21</sup>

Deleted: <sup>2</sup>

Deleted: <sup>23</sup>

Deleted:



versus 16%) and NPV (99% versus 96%), but worse specificity (70% versus 80%) and overall accuracy (71% versus 78%) than CURB in predicting mortality. One major caveat of this study is that 17% of patients (versus 3% in our study) were admitted to an ITU, which means that one may not be able to generalise these results to the NHS setting.

The definition of sepsis, which incorporates the systemic inflammatory response syndrome, was published in a consensus statement in 1992 and has since been widely adopted in research and clinical practice<sup>17</sup>. In our own hospitals, for example, the definitions given in Table 1 have been included in sepsis protocols to guide the intensity of antibiotic therapy. A North American study demonstrated that mortality due to infection increased with the number of SIRS criteria (7% with two criteria, 10% with three criteria and 17% with four criteria) and with severe sepsis (20%) and septic shock (40%)<sup>27</sup>. Jones et al also found a similar relationship in patients with bacteraemia (mortality in patients with no SIRS = 12%, SIRS 2 = 14%, SIRS 3 = 26%, SIRS 4 = 36%, severe sepsis = 38% and septic shock 56%) and it was suggested, on the basis of these studies, that SIRS was “of generalised use in predicting outcome from infection.”<sup>28</sup> Interestingly, as with our study, Jones et al also found a cohort of patients with clinical evidence of hypotension and/or hypoperfusion, but without the classical definition of SIRS. The mortality in this cohort of patients was 29% versus 28% in our study, which explains the higher mortality (17% when these patients were included versus 11% when they were classified as a separate cohort) for patients without SIRS (i.e. infection only patients).

Since then, the value of the SIRS criteria and the relationship between an increasing number of SIRS criteria and infection has been questioned. In a study of 300 internal medicine patients with new onset of fever at a university teaching hospital in The Netherlands, Bossink et al found that although there was a statistically significant association between the number of positive SIRS criteria and mortality (SIRS 1 = 0%, SIRS 2 = 3%, SIRS 3 = 8%, SIRS 4 = 17%), the performance of the definition of sepsis for predicting mortality was not as good as an alternative model proposed by the authors<sup>29</sup>. In our study,

Deleted: <sup>5</sup>

Deleted: <sup>4</sup>

Deleted: <sup>5</sup>

Deleted: This phenomenon may have been due to the median age of our cohort of patients (median age = 74 years).

Deleted: <sup>6</sup>

sepsis had a sensitivity of 73%, specificity of 30%, PPV of 20% and NPV of 83% for predicting mortality versus 63%, 60%, 13% and 94%, respectively, in the study by Bossink et al. A recent, multi-centred study using data from 3608 intensive care unit patients who had taken part in the European Sepsis Study found a gradation in mortality from uncomplicated infection or sepsis (25%) to severe sepsis (40%) to septic shock (60%)<sup>30</sup>. We found a similar association depending on how the sepsis definitions were used: from 13% (infection plus SIRS) to 38% (severe sepsis/septic shock) with the classical definition and from 11% (infection plus SIRS) to 28% (hypotension or hypo-perfusion without SIRS) to 38% (severe sepsis/septic shock) with our alternative definition. As with our study, they did not find any difference in mortality between patients with infection without SIRS and sepsis or an association between the number of SIRS criteria and mortality in these groups. The SIRS criteria may also have performed less well in our study because two of the criteria, heart rate and white cell count, have not been strongly associated with outcome in CAP<sup>7,31</sup>.

Deleted: <sup>27</sup>

Deleted: s

Deleted: with or

Deleted: s

Deleted: in UK studies

Deleted: <sup>28</sup>

In contrast to SIRS, there is less data supporting the use of SEWS in infection. This is a concern given the increasing rate at which it is being implemented in acute medical admissions units in the UK. Indeed, implementation is being encouraged by major organisations interested in clinical effectiveness, such as NHS Quality Improvement Scotland (QIS)<sup>19</sup>. SEWS is based on an Early Warning Score (EWS), which was validated for use in acute medical patients in 2001<sup>20</sup>. The AUC in the validation study was 0.67 compared to 0.62 in our study (versus 0.78 for CURB65 and 0.68 for SIRS). A subsequent study of 1695 acute medical patients, who were compared to a cohort of patients admitted to the same unit in the previous year, but prior to implementation of the EWS, did not demonstrate any change in mortality as a result of implementation<sup>21</sup>. A recent study, again from the UK, of 1047 ward patients assessed by an intensive care outreach service, found a strong statistical association between the EWS and the need for intervention or mortality<sup>32</sup>. As with SIRS, the EWS has been tested in different cohorts of patients in different contexts and it is debatable as to whether this evidence can be generalised to all patient populations. In our study, SEWS was better

Deleted: <sup>7</sup>

Deleted: <sup>18</sup>

Deleted: <sup>19</sup>

Deleted: <sup>29</sup>

than SIRS at stratifying mortality. It is possible therefore, that it could still be used to identify patients at high risk of needing critical care, once the initial decisions about an appropriate site of care and antibiotic therapy have been made. Overall, however, SEWS performed less well than CURB65, CRB65 and SIRS with regard to other operating characteristics.

Deleted:

There are a number of caveats to the interpretation of the results of our study. Patients were included using a pragmatic, real-life definition of CAP. Sub-group analysis of a chest radiograph defined cohort of patients, however, confirmed the findings of our main analyses. Because the performance of all tests is context dependent, one may not be able to extrapolate our results to healthcare systems dissimilar to the NHS. We also used a limited definition of hypo-perfusion to define severe sepsis and septic shock. We feel this is justified given that the inclusion of acidosis in clinical practice would require an additional blood test, which is not performed in all patients with CAP. Indeed, the BTS guidelines recommend arterial blood gas measurement only when the patient's SaO<sub>2</sub> is <92% or other features of severe pneumonia are present<sup>2</sup>. Additionally, acidosis is only likely to affect a relatively small number of the most severely ill patients. As urine output cannot be measured accurately on admission to hospital and would therefore delay severity assessment and reduce the practicality of the tool, oliguria was also excluded as a criterion of hypo-perfusion and was not scored in SEWS. When using SEWS, it is recommended that 3+ hours of urine output be assessed. Given that there are six other SEWS criteria, and that oliguria would be an unusual isolated finding in severe CAP, it is unlikely that the omission of this would have resulted in poorer SEWS performance. Also, oliguria was not included in the validation study by Subbe et al<sup>20</sup>. Nevertheless, it is possible that the omission of these criteria, in particular for SIRS, may have altered performance characteristics.

Deleted: the

Deleted: <sup>18</sup>

In summary, CURB65 and CRB65 were better at stratifying mortality and outperformed SIRS and SEWS in predicting 30-day mortality in CAP. For the time being, other prognostic tools should not supplant CURB65 in the initial assessment of patients with CAP. There is clearly a need for corroboration of

Deleted: as

our results and the development of better generic predictive tools for use in acute medicine and sepsis.

Deleted: ¶

**Table 1** Definitions of each of the **four** prognostic tools studied

| <b>Severity grade</b>                                                                                                                                                                                                                                                                                                                                                                                                     | <b>Score/definition</b>                                                                                                 |
|---------------------------------------------------------------------------------------------------------------------------------------------------------------------------------------------------------------------------------------------------------------------------------------------------------------------------------------------------------------------------------------------------------------------------|-------------------------------------------------------------------------------------------------------------------------|
| <b>CURB65 score</b>                                                                                                                                                                                                                                                                                                                                                                                                       |                                                                                                                         |
| Based on the presence or absence of the following criteria: new confusion, urea >7mmol/l, respiratory rate ≥30/minute, systolic blood pressure <90mmHg or diastolic blood pressure ≤60mmHg and age ≥65 years                                                                                                                                                                                                              |                                                                                                                         |
| Severe                                                                                                                                                                                                                                                                                                                                                                                                                    | 3 or more                                                                                                               |
| Non-severe, moderate risk                                                                                                                                                                                                                                                                                                                                                                                                 | 2                                                                                                                       |
| Non-severe, low risk                                                                                                                                                                                                                                                                                                                                                                                                      | 0 or 1                                                                                                                  |
| <b>CRB65 score</b>                                                                                                                                                                                                                                                                                                                                                                                                        |                                                                                                                         |
| Based on the presence or absence of the following criteria: new confusion, respiratory rate ≥30/minute, systolic blood pressure <90mmHg or diastolic blood pressure ≤60mmHg and age ≥65 years                                                                                                                                                                                                                             |                                                                                                                         |
| <b>Severe</b>                                                                                                                                                                                                                                                                                                                                                                                                             | <b>3 or 4</b>                                                                                                           |
| <b>Non-severe, moderate risk</b>                                                                                                                                                                                                                                                                                                                                                                                          | <b>1 or 2</b>                                                                                                           |
| <b>Non-severe, low risk</b>                                                                                                                                                                                                                                                                                                                                                                                               | <b>0</b>                                                                                                                |
| <b>Systemic inflammatory response syndrome (SIRS)</b>                                                                                                                                                                                                                                                                                                                                                                     |                                                                                                                         |
| The diagnosis of SIRS is based on the presence of at least two of the following criteria: temperature <36°C or >38°C, pulse >90/minute, respiratory rate >20/minute and white cell count <4 or >12 cells per mm <sup>3</sup>                                                                                                                                                                                              |                                                                                                                         |
| The diagnosis of severe sepsis and septic shock is based on the presence of SIRS in infection plus the presence or absence of hypotension and/or organ hypo-perfusion and the patients response to adequate fluid resuscitation                                                                                                                                                                                           |                                                                                                                         |
| Septic shock (severe)                                                                                                                                                                                                                                                                                                                                                                                                     | Severe sepsis plus hypotension and/or organ hypo-perfusion, which has failed to respond to adequate fluid resuscitation |
| Severe sepsis (severe)                                                                                                                                                                                                                                                                                                                                                                                                    | SIRS plus hypotension and/or organ hypo-perfusion                                                                       |
| SIRS (non-severe, intermediate risk)                                                                                                                                                                                                                                                                                                                                                                                      | ≥2 of the SIRS criteria above                                                                                           |
| No SIRS (non-severe, low risk)                                                                                                                                                                                                                                                                                                                                                                                            | <2 of the SIRS criteria above                                                                                           |
| <b>Standardised early warning system (SEWS)</b>                                                                                                                                                                                                                                                                                                                                                                           |                                                                                                                         |
| A complex scoring system based on the patient's respiratory rate, SaO <sub>2</sub> , temperature, blood pressure, heart rate, neurological response and urine output. <a href="http://www.nhshealthquality.org/nhsqis/files/Supplement%20to%20Final%20Report%20(SEWS%20Chart).pdf">The SEWS chart is available at: http://www.nhshealthquality.org/nhsqis/files/Supplement%20to%20Final%20Report%20(SEWS%20Chart).pdf</a> |                                                                                                                         |
| Inform nurse in charge and aim for doctor (at least senior house officer) review within 30 minutes (severe)                                                                                                                                                                                                                                                                                                               | ≥4                                                                                                                      |
| Hourly observations and inform nurse in charge (non-severe, intermediate risk)                                                                                                                                                                                                                                                                                                                                            | 2 or 3                                                                                                                  |
| Routine (4 hourly) observations (low risk)                                                                                                                                                                                                                                                                                                                                                                                | 0 or 1                                                                                                                  |

Deleted: ¶

Deleted: three

Formatted: Font: Bold

Formatted: Font: Bold

Formatted: Centered

Formatted: Left

Formatted: Font: 10 pt

Deleted: cottish

**Table 2** Definitions of performance characteristics<sup>24,25</sup>

| <u>Performance characteristic</u>      | <u>Definition</u><br><u>Equation</u>                                                                                                                                                                                                                                                                                                                                                                                                                              |
|----------------------------------------|-------------------------------------------------------------------------------------------------------------------------------------------------------------------------------------------------------------------------------------------------------------------------------------------------------------------------------------------------------------------------------------------------------------------------------------------------------------------|
| <u>Sensitivity</u>                     | <u>How good the test is at identifying patients who die</u><br><br><u>True positives (i.e. tested positive and died)</u><br><u>All deaths</u>                                                                                                                                                                                                                                                                                                                     |
| <u>Specificity</u>                     | <u>How good the test is at identifying patients who do not die</u><br><br><u>True negatives (i.e. tested negative and lived)</u><br><u>All alive</u>                                                                                                                                                                                                                                                                                                              |
| <u>Positive predictive value (PPV)</u> | <u>In the event of a positive test, the probability that the patient will die</u><br><br><u>True positives</u><br><u>All positives</u>                                                                                                                                                                                                                                                                                                                            |
| <u>Negative predictive value (NPV)</u> | <u>In the event of a negative test, the probability that the patient will not die</u><br><br><u>True negatives</u><br><u>All negatives</u>                                                                                                                                                                                                                                                                                                                        |
| <u>Accuracy</u>                        | <u>The proportion of all tests that have given a correct result</u><br><br><u>True positives and negatives</u><br><u>All positives and negatives</u>                                                                                                                                                                                                                                                                                                              |
| <u>Receiver operating curve (ROC)</u>  | <u>A curve created by mapping sensitivity against 1 minus specificity. The area under the curve (AUC) is a marker of performance with higher values indicating better diagnostic ability. An AUC=1 indicates perfect performance whereas an AUC=0.5 indicates that there is a 50:50 chance that the test correctly identifies those who die</u>                                                                                                                   |
| <u>Comment</u>                         | <u>Sensitivity and specificity are useful when considering the performance of a test at the population level. In contrast, PPV, NPV and accuracy are better when considering the performance of a test at the patient level (i.e. In the event of a positive test result, what is the probability that the patient in front of me will or will not die?). It is also important to consider how easy a test is to apply in clinical practice (see discussion).</u> |
|                                        |                                                                                                                                                                                                                                                                                                                                                                                                                                                                   |

- Deleted: ¶
- ¶
- ¶
- ¶
- ¶
- ¶
- ¶
- ¶
- Formatted: Font: Not Bold, Superscript
- Formatted: Font: Bold
- Formatted Table
- Formatted: Centered
- Formatted: Font: Bold
- Formatted: Centered
- Formatted: Font: 10 pt, Not Bold
- Formatted: Font: 10 pt, Not Bold
- Formatted: Centered
- Formatted: Font: 10 pt, Not Bold
- Formatted: Centered
- Formatted: Font: 10 pt, Not Bold
- Formatted: Centered
- Formatted: Underline
- Formatted: Underline
- Formatted: Font: 10 pt, Not Bold
- Formatted: Font: 10 pt, Not Bold
- Formatted: Centered
- Formatted: Underline
- Formatted: Font: 10 pt, Not Bold
- Formatted
- Formatted: Centered
- Formatted: Underline
- Formatted
- Formatted: Centered
- Formatted: Underline
- Formatted
- Formatted
- Formatted: Left
- Formatted
- Formatted: Font: Bold
- Formatted: Centered
- Formatted: Left
- Formatted

**Table 3** Demographic and clinical characteristics of the patients included

| <b>Numbers included</b>                                                                                      |                                                                         |
|--------------------------------------------------------------------------------------------------------------|-------------------------------------------------------------------------|
| Number included in the quality improvement project<br>(Appendix 1, Thorax website gives data on full cohort) | 503                                                                     |
| Number of patients with full data for all <b>four</b> tools                                                  | 419                                                                     |
| <b>Demographics</b>                                                                                          |                                                                         |
| Sex                                                                                                          | 47% male (n = 197)                                                      |
| Age                                                                                                          | Median = 74 years (range 16 to 98)<br>Age over 65 years = 70% (n = 292) |
| Living in own home                                                                                           | 84% (n = 351)                                                           |
| Living alone                                                                                                 | 36% (n = 152)                                                           |
| <b>Clinical characteristics</b>                                                                              |                                                                         |
| Antibiotic from GP prior to admission                                                                        | 42% (n = 149/356)                                                       |
| CRP >50                                                                                                      | 76.5% (n = 286/374)                                                     |
| Chest radiograph consistent with pneumonia                                                                   | 95% (218/230)                                                           |
| <b>Severity assessment on admission</b>                                                                      |                                                                         |
| CURB65 score                                                                                                 |                                                                         |
| 0 or 1                                                                                                       | 33.5% (n = 140)                                                         |
| 2                                                                                                            | 28.5% (n = 119)                                                         |
| 3 or more                                                                                                    | 38% (n = 160)                                                           |
| Respiratory rate ≥30/minute                                                                                  | 22% (n = 91)                                                            |
| Systolic blood pressure <90mmHg                                                                              | 6% (n = 24)                                                             |
| Diastolic blood pressure ≤60mmHg                                                                             | 25% (n = 103)                                                           |
| Pulse ≥125/minute                                                                                            | 10% (n = 43)                                                            |
| Pulse oximetry <92% (any FiO <sub>2</sub> )                                                                  | 33% (n = 140)                                                           |
| Blood urea >7mmol/l                                                                                          | 58% (n = 242)                                                           |
| New confusion                                                                                                | 31% (n = 129)                                                           |
| % without co-morbidity                                                                                       | 35% (n = 147)                                                           |
| % with asthma/COPD                                                                                           | 35% (n = 146)                                                           |
| <b>Initial antibiotic regimen</b>                                                                            |                                                                         |
| Broad spectrum beta-lactam + macrolide                                                                       | 48% (n = 201)                                                           |
| Narrow spectrum beta-lactam + macrolide                                                                      | 31% (n = 130)                                                           |
| Beta-lactam monotherapy                                                                                      | 10% (n = 42)                                                            |
| Macrolide monotherapy                                                                                        | 3% (n = 13)                                                             |
| Levofloxacin                                                                                                 | 2% (n = 8)                                                              |
| Others                                                                                                       | 6% (n = 25)                                                             |
| <b>Outcomes</b>                                                                                              |                                                                         |
| % of patients transferred to the intensive care unit                                                         | 3% (n = 13)                                                             |
| 30-day post admission mortality                                                                              | 19% (n = 79)                                                            |
| Length of hospital stay (excludes deaths)                                                                    | Median = 5 days (range 0 to 116)                                        |

Deleted: 2

Formatted: Font: 10 pt

Formatted: Font: 9 pt, Not Bold

Formatted: Font: 9 pt, Not Bold

Formatted: Font: 9 pt

Deleted: three

Formatted: Font: 9 pt

Formatted: Font: 10 pt

Deleted: Mean = 69.5years]]

Deleted: 5

Formatted: Font: 9 pt

Formatted: Font: 9 pt

Deleted: % I

Formatted: Font: 10 pt

Deleted: (76.5%

Formatted: Font: 9 pt

Formatted: Font: Not Bold

Formatted: Font: 9 pt

Deleted: % without co-morbidity (... [7])

Formatted: Font: 9 pt

Deleted: Mean = 9.6 days (SE = 0.73)]]

**Table 4** Operating characteristics of CURB65, CRB65, SIRS criteria used in four different ways and SEWS

| Severity                                                                                                                                                                                                                                                                                                                                                                                             | Mortality     | Sensitivity | Specificity | PPV | NPV   |
|------------------------------------------------------------------------------------------------------------------------------------------------------------------------------------------------------------------------------------------------------------------------------------------------------------------------------------------------------------------------------------------------------|---------------|-------------|-------------|-----|-------|
| <b>CURB65</b>                                                                                                                                                                                                                                                                                                                                                                                        |               |             |             |     |       |
| CURB65 = 0                                                                                                                                                                                                                                                                                                                                                                                           | 0/58 (0%)     | 100%        | 0%          | 19% | NC    |
| CURB65 = 1                                                                                                                                                                                                                                                                                                                                                                                           | 3/82 (4%)     | 100%        | 17%         | 22% | 100%  |
| CURB65 = 2                                                                                                                                                                                                                                                                                                                                                                                           | 20/119 (17%)  | 96%         | 40%         | 27% | 98%   |
| CURB65 = 3                                                                                                                                                                                                                                                                                                                                                                                           | 27/105 (26%)  | 71%         | 69%         | 35% | 91%   |
| CURB65 = 4                                                                                                                                                                                                                                                                                                                                                                                           | 27/49 (55%)   | 37%         | 92%         | 53% | 86%   |
| CURB65 = 5                                                                                                                                                                                                                                                                                                                                                                                           | 2/6 (33%)     | 2.5%        | 99%         | 33% | 81%   |
| <b>CRB65</b>                                                                                                                                                                                                                                                                                                                                                                                         |               |             |             |     |       |
| CRB65 = 0                                                                                                                                                                                                                                                                                                                                                                                            | 0/71 (0%)     | 100%        | 0%          | 19% | NC    |
| CRB65 = 1                                                                                                                                                                                                                                                                                                                                                                                            | 21/150 (14%)  | 100%        | 21%         | 23% | 100%  |
| CRB65 = 2                                                                                                                                                                                                                                                                                                                                                                                            | 28/131 (21%)  | 73%         | 59%         | 29% | 90.5% |
| CRB65 = 3                                                                                                                                                                                                                                                                                                                                                                                            | 28/61 (46%)   | 38%         | 89%         | 45% | 86%   |
| CRB65 = 4                                                                                                                                                                                                                                                                                                                                                                                            | 2/6 (33%)     | 2.5%        | 99%         | 33% | 81%   |
| <b>SIRS used in four different ways</b>                                                                                                                                                                                                                                                                                                                                                              |               |             |             |     |       |
| No SIRS <sup>1</sup>                                                                                                                                                                                                                                                                                                                                                                                 | 21/124 (17%)  | 100%        | 0%          | 19% | NC    |
| SIRS                                                                                                                                                                                                                                                                                                                                                                                                 | 21/197 (11%)  | 73%         | 30%         | 20% | 83%   |
| Severe sepsis/septic shock                                                                                                                                                                                                                                                                                                                                                                           | 37/98 (38%)   | 47%         | 82%         | 38% | 87%   |
| SIRS = 0 <sup>2</sup>                                                                                                                                                                                                                                                                                                                                                                                | 5/35 (14%)    | 100%        | 0%          | 19% | NC    |
| SIRS = 1                                                                                                                                                                                                                                                                                                                                                                                             | 16/89 (18%)   | 94%         | 9%          | 19% | 86%   |
| SIRS = 2                                                                                                                                                                                                                                                                                                                                                                                             | 28/136 (21%)  | 73%         | 30%         | 20% | 83%   |
| SIRS = 3                                                                                                                                                                                                                                                                                                                                                                                             | 27/113 (24%)  | 38%         | 62%         | 19% | 81%   |
| SIRS = 4                                                                                                                                                                                                                                                                                                                                                                                             | 3/46 (6%)     | 4%          | 87%         | 6%  | 80%   |
| SIRS = 0 <sup>3</sup>                                                                                                                                                                                                                                                                                                                                                                                | 5/35 (14%)    | 100%        | 0%          | 19% | NC    |
| SIRS = 1                                                                                                                                                                                                                                                                                                                                                                                             | 16/89 (18%)   | 94%         | 9%          | 19% | 86%   |
| SIRS = 2                                                                                                                                                                                                                                                                                                                                                                                             | 12/89 (13%)   | 73%         | 30%         | 20% | 83%   |
| SIRS = 3                                                                                                                                                                                                                                                                                                                                                                                             | 8/75 (11%)    | 58%         | 53%         | 22% | 84%   |
| SIRS = 4                                                                                                                                                                                                                                                                                                                                                                                             | 1/33 (3%)     | 48%         | 73%         | 29% | 86%   |
| Severe sepsis/septic shock                                                                                                                                                                                                                                                                                                                                                                           | 37/98 (38%)   | 47%         | 82%         | 38% | 87%   |
| No SIRS or hypotension/organ hypo-perfusion <sup>4</sup>                                                                                                                                                                                                                                                                                                                                             | 9/81 (11%)    | 100%        | 0%          | 19% | NC    |
| SIRS                                                                                                                                                                                                                                                                                                                                                                                                 | 21/197 (11%)  | 89%         | 21%         | 21% | 89%   |
| Hypotension and/or organ hypo-perfusion, but no SIRS                                                                                                                                                                                                                                                                                                                                                 | 12/43 (28%)   | 62%         | 73%         | 35% | 89%   |
| Severe sepsis/septic shock                                                                                                                                                                                                                                                                                                                                                                           | 37/98 (38%)   | 47%         | 82%         | 38% | 87%   |
| <b>SEWS</b>                                                                                                                                                                                                                                                                                                                                                                                          |               |             |             |     |       |
| SEWS = 0                                                                                                                                                                                                                                                                                                                                                                                             | 4/41 (10%)    | 100%        | 0%          | 19% | NC    |
| SEWS = 1                                                                                                                                                                                                                                                                                                                                                                                             | 5/58 (9%)     | 95%         | 11%         | 20% | 90%   |
| SEWS = 2                                                                                                                                                                                                                                                                                                                                                                                             | 41/153 (27%)  | 89%         | 26%         | 22% | 91%   |
| SEWS = 3                                                                                                                                                                                                                                                                                                                                                                                             | 12/80 (15%)   | 67%         | 47%         | 23% | 86%   |
| SEWS = 4                                                                                                                                                                                                                                                                                                                                                                                             | 10/57 (17.5%) | 52%         | 67%         | 27% | 86%   |
| SEWS = 5                                                                                                                                                                                                                                                                                                                                                                                             | 8/34 (23.5%)  | 39%         | 81%         | 32% | 85%   |
| SEWS ≥ 6                                                                                                                                                                                                                                                                                                                                                                                             | 23/62 (37%)   | 29%         | 88%         | 38% | 84%   |
| <p>NC = not calculable</p> <p>1. Defined as in Table 1</p> <p>2. Defined by presence or absence of: temperature &lt;36°C or &gt;38°C, pulse &gt;90/minute, respiratory rate &gt;20/minute and white cell count &lt;4 or &gt;12 cells per mm<sup>3</sup></p> <p>3. Defined by above plus definition of severe sepsis/septic shock given in Table 1</p> <p>4. New definition (see results section)</p> |               |             |             |     |       |

- Deleted: ¶ ... [8]
- Formatted Table ... [9]
- Formatted ... [10]
- Formatted ... [11]
- Deleted: 0 or ... [12]
- Deleted: ¶
- Deleted: or more ... [13]
- Formatted ... [14]
- Formatted ... [15]
- Formatted ... [16]
- Formatted ... [17]
- Formatted ... [18]
- Formatted ... [19]
- Formatted ... [20]
- Formatted ... [21]
- Deleted: 4
- Formatted ... [22]
- Formatted ... [23]
- Formatted ... [24]
- Formatted ... [25]
- Formatted ... [26]
- Formatted ... [27]
- Deleted: or
- Formatted ... [28]
- Formatted ... [29]
- Formatted ... [30]
- Formatted ... [31]
- Formatted ... [32]
- Formatted ... [33]
- Formatted ... [34]
- Formatted ... [35]
- Formatted ... [36]
- Formatted ... [37]
- Formatted ... [38]
- Formatted ... [39]
- Formatted ... [40]
- Formatted ... [41]
- Deleted: or
- Formatted ... [42]
- Formatted ... [43]
- Formatted ... [44]
- Formatted ... [45]
- Formatted ... [46]
- Deleted: No SIRS, but h
- Formatted ... [47]
- Formatted ... [48]
- Formatted ... [49]
- Deleted: or
- Formatted ... [50]
- Deleted: or 1...¶
- Formatted ... [51]
- Formatted ... [52]
- Deleted: 9/99
- Formatted ... [53]
- Deleted: 9
- Formatted ... [54]
- Formatted ... [55]
- Formatted ... [56]
- Formatted ... [57]



**Table 5** Comparison of the performance characteristics of CURB65 in three different validation studies

| Study               | Study reported here<br>n = 419<br>% | Study reported here, CXR cohort*<br>n = 218<br>% | Lim et al <sup>1</sup><br>n = 932<br>% | Capelastegui et al <sup>21</sup><br>n = 1100<br>inpatients, 676<br>outpatients<br>% |
|---------------------|-------------------------------------|--------------------------------------------------|----------------------------------------|-------------------------------------------------------------------------------------|
| <b>CURB65 score</b> |                                     |                                                  |                                        |                                                                                     |
| 0                   | 0                                   | 0                                                | 0.6                                    | 0                                                                                   |
| 1                   | 3.7                                 | 2.1                                              | 1.7                                    | 1.1                                                                                 |
| 2                   | 16.8                                | 14.8                                             | 9.0                                    | 7.6                                                                                 |
| 3                   | 25.7                                | 19.6                                             | 16.1                                   | 21                                                                                  |
| 4                   | 55.1                                | 37.5                                             | 36.9                                   | 41.9                                                                                |
| 5                   | 33.3                                | 50                                               | 20                                     | 60                                                                                  |

\* Patients with a chest radiograph that had been reported by a consultant radiologist or seen by a consultant respiratory physician with associated documentation in the case-notes

- Deleted: ¶
- ¶
- ¶
- Formatted: Left, Line spacing: single, Tabs: Not at 216 pt + 432 pt
- Formatted: Font: 11 pt
- Formatted: Font: Bold
- Formatted: Centered, Line spacing: single
- Formatted: Font: Bold
- Formatted ... [61]
- Formatted Table
- Formatted ... [62]
- Deleted: ¶
- Formatted: Font: Bold
- Deleted: ¶
- Formatted ... [63]
- Deleted: ¶ ... [64]
- Formatted: Font: 8 pt
- Formatted ... [65]
- Formatted: Font: 10 pt
- Formatted ... [66]
- Formatted ... [67]
- Formatted ... [68]
- Formatted: Font: 10 pt
- Formatted ... [69]
- Formatted ... [70]
- Formatted ... [71]
- Formatted: Font: 10 pt
- Formatted ... [72]
- Formatted ... [73]
- Formatted ... [74]
- Formatted: Font: 10 pt
- Formatted ... [75]
- Formatted ... [76]
- Formatted ... [77]
- Formatted: Font: 10 pt
- Formatted ... [78]
- Formatted ... [79]
- Formatted ... [80]
- Formatted: Font: 10 pt
- Formatted ... [81]
- Formatted ... [82]
- Formatted: Font: 9 pt
- Formatted: Left
- Formatted ... [83]

## References

1. Jha AK, Li Z, Orav EJ, Epstein AM. Care in US hospitals-the Hospital Quality Alliance program. *N Engl J Med* 2005;**353**:265-274
2. BTS guidelines for the management of community-acquired pneumonia in adults. *Thorax* 2001;**56**:Suppl 4,1-64
3. Bartlett JG, Dowell SF, Mandell LA, File TM Jr., Musher DM, Fine MJ. Practice guidelines for the management of community-acquired pneumonia in adults. *Clin Infect Dis* 2000;**31**:347-382
4. Mandell LA, Marrie TJ, Grossman RF, Chow AW, Hyland RH, and the Canadian Community-Acquired Pneumonia Working Group. Canadian guidelines for the initial management of community-acquired pneumonia: an evidence-based update by the Canadian Infectious Diseases Society and the Canadian Thoracic Society. The Canadian Community-Acquired Pneumonia Working Group. *Clin Infect Dis* 2000;**31**:383-421
5. American Thoracic Society. Guidelines for the management of adults with community-acquired pneumonia. *Am J Respir Crit Care Med* 2001;**163**:1730-1754
6. Fine MJ, Auble TE, Yealy DM, Hanusa BH, Weissfeld LA, Singer DE, Coley CM, Marrie TJ, Kapoor WN. A prediction rule to identify low risk patients with community-acquired pneumonia. *N Engl J Med* 1997;**336**:243-50
7. Lim WS, van der Eerden MM, Laing R, Boersma WG, Karalus, N, Town GI, Lewis SA, Macfarlane JT. Defining community-acquired pneumonia severity on presentation to hospital: an international derivation and validation study. *Thorax* 2003;**58**:377-82
8. Carratala J, Fernandez-Sabe N, Ortega L, Castellsague X, Roson B, Dorca J, Fernandez-Aguera A, Verdaguer R, Martinez J, Manresa F, Gudiol F. Outpatient care compared with hospitalization for community-acquired pneumonia: a randomized trial in low-risk patients. *Ann Intern Med* 2005;**142**:165-172
9. Marrie TJ, Lau CY, Wheeler SL, Wong CJ, Vandervoort MK, Feagan BG. A controlled trial of a critical pathway for treatment of community-acquired pneumonia. CAPITAL Study Investigators. Community-Acquired Pneumonia Intervention Trial Assessing Levofloxacin. *JAMA* 2000;**283**:749-755
10. Yealy DM, Auble TE, Stone RA, Lave JR, Meehan TP, Graff LG, Fine JM, Obrosky DS, Mor MK, Whittle J, Fine MJ. Effect of increasing the intensity of implementing pneumonia guidelines: a randomized, controlled trial. *Ann Intern Med* 2005;**143**:881-894
11. British Thoracic Society and the Public Health Laboratory Service. Community-acquired pneumonia in adults in British hospitals in 1982-1983: a survey of aetiology, mortality, prognostic factors and outcome. *Q J Med* 1987;**239**:195-220
12. Neill AM, Martin IR, Weir R, Anderson R, Cheresky A, Epton MJ, Jackson R, Schoesboe M, Frampton C, Hutton S, Chambers ST, Town GI. Community-acquired pneumonia: aetiology and usefulness of severity criteria on admission. *Thorax* 1996;**51**:1010-6
13. Barlow GD, Nathwani D, Davey P. Improving the management of community-acquired pneumonia: barriers to high-quality care in a

United Kingdom teaching hospital. In: Programme and Abstracts of 13th European Congress of Clinical Microbiology and Infectious Diseases, Glasgow, UK, May 200.

14. Woodhead M. Assessment of illness severity in community acquired pneumonia: a useful new prediction tool? *Thorax* 2003;**58**:371-372

15. [Ewig S, Ruiz M, Mensa J, Marcos MA, Martinez JA, Arancibia F, Niederman MS, Torres A. Severe community-acquired pneumonia: assessment of severity criteria. \*Am J Respir Crit Care Med\* 1998;\*\*158\*\*:1102-8](#)

16. [Capelastegui A, España PP, Quintana JM, Areitio I, Gorordo I, Egurrola M, Bilbao A. Validation of a predictive rule for the management of community-acquired pneumonia. \*Eur Resp J\* 2006;\*\*27\*\*:151-7](#)

17. American College of Chest Physicians-Society of Critical Care Medicine Consensus Conference. Definitions for sepsis and organ failure and guidelines for use of innovative therapies in sepsis. *Crit Care Med* 1992;**20**:864-75

18. Bernard GR, Vincent J-L, Laterre P-R, LaRosa SP, Dhainaut J-F, Lopez-Rodriguez A, Steingrub JS, Garber GE, Helterbrand JD, Ely EW, Fisher CJ for the Recombinant Human Activated Protein C Worldwide Evaluation in Severe Sepsis (PROWESS) Study Group. Efficacy and safety of recombinant human activated protein C for severe sepsis. *N Eng J Med* 2001;**344**:699-709

19. Emergency medical admissions scoping group final report. NHS Quality Improvement Scotland, Edinburgh, UK, July 2004.

[The SEWS chart is available at:](#)

[http://www.nhshealthquality.org/nhsqis/files/Supplement%20to%20Final%20Report%20\(SEWS%20Chart\).pdf](http://www.nhshealthquality.org/nhsqis/files/Supplement%20to%20Final%20Report%20(SEWS%20Chart).pdf)

20. Subbe CP, Kruger M, Rutherford P, Gemmel L. Validation of a modified Early Warning Score in medical admissions. *Q J Med* 2001;**94**:521-526

21. Subbe CP, Davies RG, Williams E, Rutherford P, Gemmel L. Effect of introducing the Modified Early Warning Score on clinical outcomes, cardio-pulmonary arrests and intensive care utilisation in acute medical admissions. *Anaesthesia* 2003;**58**:797-802

22. McBride J, Knight D, Piper J, Smith GB. Long-term effect of introducing an early warning score on respiratory rate charting on general wards. *Resuscitation* 2005;**65**: 41-44.

23. [Barlow G, Nathwani D, Williams F, Ogston S, Winter J, Jones M, Slane P, Myers E, Sullivan F, Stevens N, Duffey R, Lowden K, Davey P. Reducing door to antibiotic time in community-acquired pneumonia: controlled before and after evaluation and cost-effectiveness analysis. \*Thorax\* 2006, accepted for Online 1<sup>st</sup>, in press](#)

24. Greenhalgh T. Papers that report diagnostic or screening tests. In: [How to read a paper. The basics of evidence based medicine, 2<sup>nd</sup> Edition \(Ed. Greenhalgh T\). BMJ Books 2001, BMJ Publishing Group, London, UK.](#)

25. [Giesecke J. Clinical epidemiology: sensitivity, specificity and misclassification. In: Modern infectious disease epidemiology, 2<sup>nd</sup> Edition \(Ed. Giesecke T\). Arnold 2002, Hodder Headline Group, London, UK.](#)

Formatted: Bullets and Numbering

Formatted: English (U.K.)

Formatted: Indent: Left: 36 pt

Formatted: Font: 12 pt

Formatted: Bullets and Numbering

Formatted: Normal, Left, Don't adjust right indent when grid is defined, Numbered + Level: 1 + Numbering Style: 1, 2, 3, ... + Start at: 1 + Alignment: Left + Aligned at: 18 pt + Tab after: 36 pt + Indent at: 36 pt, Don't suppress line numbers, Don't adjust space between Latin and Asian text, Don't adjust space between Asian text and numbers

Deleted: ¶

Formatted: Font: (Default) Arial

Formatted: Bullets and Numbering

Formatted: Font: (Default) Arial, 12 pt

Formatted: Font: (Default) Arial, 12 pt, Not Bold

Formatted: Superscript

Formatted: Superscript

Formatted: English (U.S.)

26. Ewig S, de Roux A, Bauer T, García E, Mensa J, Niederman M, Torres A. Validation of predictive rules and indices of severity for community acquired pneumonia. *Thorax* 2004;**59**:421-427
27. Rangel-Frausto MS, Pittet D, Costigan M, Hwang T, Davis CS, Wenzel RP. The natural history of the systemic inflammatory response syndrome (SIRS). *JAMA* 1995;**273**:117-23
28. Jones GR, Lowes JA. The systemic inflammatory response syndrome as a predictor of bacteraemia and outcome from sepsis. *Q J Med* 1996;**89**: 515-22
29. Bossink AW, Groeneveld J, Hack CE, Thijs LG. Prediction of mortality in febrile medical patients: How useful are systemic inflammatory response syndrome and sepsis criteria. *Chest* 1998;**113**:1533-41
30. Albert C, Brun-Buisson C, Goodman SV, Duidici D, Granton J, Moreno R, Smithies M, Thomas O, Artigas A and Le Gall JR for the European Sepsis Group. Influence of systemic inflammatory response syndrome and sepsis on outcomes of critically ill infected patients. *Am J Respir Crit Care Med* 2003;**168**:77-84
31. Lim WS, Lewis S, Macfarlane JT. Severity prediction rules in community acquired pneumonia: a validation study. *Thorax* 2000;**55**:219-223
32. Goldhill DR, McNarry AF, Mandersloot G, McGinley A. A physiologically-based early warning score for ward patients: the association between score and outcome. *Anaesthesia* 2005;**60**:547-53

Deleted: <#>Capelastegui A, España PP, Quintana JM, Areitio I, Gorordo I, Egurrola M, Bilbao A. Validation of a predictive rule for the management of community-acquired pneumonia. *Eur Resp J* 2006;**27**:151-7¶  
<#>Ewig S, Ruiz M, Mensa J, Marcos MA, Martinez JA, Arancibia F, Niederman MS, Torres A. Severe community-acquired pneumonia: assessment of severity criteria. *Am J Respir Crit Care Med* 1998;**158**:1102-8¶

**Contributors:** GB had the initial study idea, collected and analysed the data and wrote the initial draft of the paper. PD and DN were involved in developing the initial idea and edited the initial [and subsequent](#) drafts of the paper. PD is the guarantor.

**Funding:** The original quality improvement project was funded by NHS Education Scotland and The Chief Scientist Office, Scotland.

Deleted: ¶

**Competing interests:** None declared

**Ethical approval:** Collection of data was approved by both Tayside University Hospitals NHS Trust's medical ethics committee and Caldicot guardian

The Corresponding Author has the right to grant on behalf of all authors and does grant on behalf of all authors, an exclusive licence (or non exclusive for government employees) on a worldwide basis to the BMJ Publishing Group Ltd to permit this article (if accepted) to be published in THORAX and any other BMJPG products and sublicences such use and exploit all subsidiary rights, as set out in our licence

Deleted: ¶  
¶

|                                                 |              |                           |
|-------------------------------------------------|--------------|---------------------------|
| Page 14: [1] Formatted<br>Font: 10 pt, Not Bold | Gavin.Barlow | 18/07/2006 2:40 PM        |
| Page 14: [2] Formatted<br>Font: 10 pt, Not Bold | Gavin.Barlow | 18/07/2006 2:40 PM        |
| Page 14: [3] Formatted<br>Font: 10 pt, Not Bold | Gavin.Barlow | 18/07/2006 2:40 PM        |
| Page 14: [4] Formatted<br>Font: 10 pt, Not Bold | Gavin.Barlow | 18/07/2006 2:40 PM        |
| Page 14: [5] Formatted<br>Font: 10 pt, Not Bold | Gavin.Barlow | 18/07/2006 2:40 PM        |
| Page 14: [6] Formatted<br>Font: 10 pt, Not Bold | Gavin.Barlow | 18/07/2006 2:40 PM        |
| Page 15: [7] Deleted<br>% without co-morbidity  | Gavin.Barlow | 01/08/2006 3:31 PM<br>35% |
| Page 16: [8] Deleted                            | Gavin.Barlow | 01/08/2006 3:42 PM        |

|                                              |              |                    |
|----------------------------------------------|--------------|--------------------|
| Page 16: [8] Deleted<br><b>3</b>             | Gavin.Barlow | 18/07/2006 3:51 PM |
| Page 16: [9] Change<br>Formatted Table       | Gavin.Barlow | 01/08/2006 3:54 PM |
| Page 16: [10] Formatted<br>Font: 10 pt       | Gavin.Barlow | 01/08/2006 4:45 PM |
| Page 16: [11] Formatted<br>Space After: 6 pt | Gavin.Barlow | 01/08/2006 4:50 PM |
| Page 16: [12] Deleted<br>0 or                | Gavin.Barlow | 31/07/2006 4:04 PM |
| Page 16: [12] Deleted<br>140                 | Gavin.Barlow | 01/08/2006 3:44 PM |
| Page 16: [12] Deleted<br>2                   | Gavin.Barlow | 01/08/2006 3:44 PM |
| Page 16: [12] Deleted                        | Gavin.Barlow | 01/08/2006 4:33 PM |
| Page 16: [12] Deleted<br>0                   | Gavin.Barlow | 31/07/2006 3:37 PM |
| Page 16: [12] Deleted<br>19                  | Gavin.Barlow | 31/07/2006 3:37 PM |
| Page 16: [12] Deleted<br>NC                  | Gavin.Barlow | 31/07/2006 3:37 PM |
| Page 16: [13] Deleted<br>or more             | Gavin.Barlow | 31/07/2006 4:05 PM |
| Page 16: [13] Deleted                        | Gavin.Barlow | 01/08/2006 3:45 PM |

|                                              |                    |                    |
|----------------------------------------------|--------------------|--------------------|
| Page 16: [13] Deleted                        | Gavin.Barlow<br>60 | 01/08/2006 3:45 PM |
| Page 16: [13] Deleted                        | Gavin.Barlow<br>35 | 01/08/2006 3:45 PM |
| Page 16: [13] Deleted                        | Gavin.Barlow       | 01/08/2006 4:34 PM |
| Page 16: [14] Formatted<br>Font: 10 pt, Bold | Gavin.Barlow       | 01/08/2006 4:45 PM |
| Page 16: [15] Formatted<br>Space After: 6 pt | Gavin.Barlow       | 01/08/2006 4:50 PM |
| Page 16: [16] Formatted<br>Font: 9 pt        | Gavin.Barlow       | 01/08/2006 4:45 PM |
| Page 16: [16] Formatted<br>Font: 9 pt        | Gavin.Barlow       | 01/08/2006 4:45 PM |
| Page 16: [16] Formatted<br>Font: 9 pt        | Gavin.Barlow       | 01/08/2006 4:45 PM |
| Page 16: [16] Formatted<br>Font: 9 pt        | Gavin.Barlow       | 01/08/2006 4:45 PM |
| Page 16: [17] Formatted<br>Font: 9 pt        | Gavin.Barlow       | 01/08/2006 4:45 PM |
| Page 16: [17] Formatted<br>Font: 9 pt        | Gavin.Barlow       | 01/08/2006 4:45 PM |
| Page 16: [17] Formatted<br>Font: 9 pt        | Gavin.Barlow       | 01/08/2006 4:45 PM |
| Page 16: [17] Formatted<br>Font: 9 pt        | Gavin.Barlow       | 01/08/2006 4:45 PM |
| Page 16: [18] Formatted<br>Font: 9 pt        | Gavin.Barlow       | 01/08/2006 4:45 PM |
| Page 16: [18] Formatted<br>Font: 9 pt        | Gavin.Barlow       | 01/08/2006 4:45 PM |
| Page 16: [18] Formatted<br>Font: 9 pt        | Gavin.Barlow       | 01/08/2006 4:45 PM |
| Page 16: [18] Formatted<br>Font: 9 pt        | Gavin.Barlow       | 01/08/2006 4:45 PM |
| Page 16: [19] Formatted<br>Font: 9 pt        | Gavin.Barlow       | 01/08/2006 4:45 PM |
| Page 16: [19] Formatted<br>Font: 9 pt        | Gavin.Barlow       | 01/08/2006 4:45 PM |
| Page 16: [19] Formatted<br>Font: 9 pt        | Gavin.Barlow       | 01/08/2006 4:45 PM |
| Page 16: [19] Formatted<br>Font: 9 pt        | Gavin.Barlow       | 01/08/2006 4:45 PM |
| Page 16: [20] Formatted<br>Font: 9 pt        | Gavin.Barlow       | 01/08/2006 4:45 PM |
| Page 16: [20] Formatted                      | Gavin.Barlow       | 01/08/2006 4:45 PM |

Font: 9 pt

|                         |              |                    |
|-------------------------|--------------|--------------------|
| Page 16: [20] Formatted | Gavin.Barlow | 01/08/2006 4:45 PM |
|-------------------------|--------------|--------------------|

Font: 9 pt

|                         |              |                    |
|-------------------------|--------------|--------------------|
| Page 16: [20] Formatted | Gavin.Barlow | 01/08/2006 4:45 PM |
|-------------------------|--------------|--------------------|

Font: 9 pt

|                         |              |                    |
|-------------------------|--------------|--------------------|
| Page 16: [21] Formatted | Gavin.Barlow | 01/08/2006 4:50 PM |
|-------------------------|--------------|--------------------|

Line spacing: single

|                         |              |                    |
|-------------------------|--------------|--------------------|
| Page 16: [22] Formatted | Gavin.Barlow | 01/08/2006 4:46 PM |
|-------------------------|--------------|--------------------|

Font: 10 pt

|                         |              |                    |
|-------------------------|--------------|--------------------|
| Page 16: [23] Formatted | Gavin.Barlow | 01/08/2006 4:45 PM |
|-------------------------|--------------|--------------------|

Font: 9 pt

|                         |              |                    |
|-------------------------|--------------|--------------------|
| Page 16: [23] Formatted | Gavin.Barlow | 01/08/2006 4:45 PM |
|-------------------------|--------------|--------------------|

Superscript

|                         |              |                    |
|-------------------------|--------------|--------------------|
| Page 16: [24] Formatted | Gavin.Barlow | 01/08/2006 4:35 PM |
|-------------------------|--------------|--------------------|

Space After: 0 pt

|                         |              |                    |
|-------------------------|--------------|--------------------|
| Page 16: [25] Formatted | Gavin.Barlow | 01/08/2006 4:35 PM |
|-------------------------|--------------|--------------------|

Space After: 0 pt

|                         |              |                    |
|-------------------------|--------------|--------------------|
| Page 16: [26] Formatted | Gavin.Barlow | 01/08/2006 4:45 PM |
|-------------------------|--------------|--------------------|

Font: 9 pt

|                         |              |                    |
|-------------------------|--------------|--------------------|
| Page 16: [27] Formatted | Gavin.Barlow | 01/08/2006 4:35 PM |
|-------------------------|--------------|--------------------|

Space After: 0 pt

|                         |              |                    |
|-------------------------|--------------|--------------------|
| Page 16: [28] Formatted | Gavin.Barlow | 01/08/2006 4:35 PM |
|-------------------------|--------------|--------------------|

Space After: 0 pt, Line spacing: single

|                         |              |                    |
|-------------------------|--------------|--------------------|
| Page 16: [29] Formatted | Gavin.Barlow | 01/08/2006 4:45 PM |
|-------------------------|--------------|--------------------|

Font: 9 pt

|                         |              |                    |
|-------------------------|--------------|--------------------|
| Page 16: [29] Formatted | Gavin.Barlow | 01/08/2006 4:45 PM |
|-------------------------|--------------|--------------------|

Superscript

|                         |              |                    |
|-------------------------|--------------|--------------------|
| Page 16: [30] Formatted | Gavin.Barlow | 01/08/2006 4:35 PM |
|-------------------------|--------------|--------------------|

Space After: 0 pt, Line spacing: single

|                         |              |                    |
|-------------------------|--------------|--------------------|
| Page 16: [31] Formatted | Gavin.Barlow | 01/08/2006 4:35 PM |
|-------------------------|--------------|--------------------|

Space After: 0 pt, Line spacing: single

|                         |              |                    |
|-------------------------|--------------|--------------------|
| Page 16: [32] Formatted | Gavin.Barlow | 01/08/2006 4:35 PM |
|-------------------------|--------------|--------------------|

Space After: 0 pt, Line spacing: single

|                         |              |                    |
|-------------------------|--------------|--------------------|
| Page 16: [33] Formatted | Gavin.Barlow | 01/08/2006 4:35 PM |
|-------------------------|--------------|--------------------|

Space After: 0 pt, Line spacing: single

|                         |              |                    |
|-------------------------|--------------|--------------------|
| Page 16: [34] Formatted | Gavin.Barlow | 01/08/2006 4:35 PM |
|-------------------------|--------------|--------------------|

Space After: 0 pt, Line spacing: single

|                         |              |                    |
|-------------------------|--------------|--------------------|
| Page 16: [35] Formatted | Gavin.Barlow | 01/08/2006 4:45 PM |
|-------------------------|--------------|--------------------|

Font: 9 pt

|                         |              |                    |
|-------------------------|--------------|--------------------|
| Page 16: [35] Formatted | Gavin.Barlow | 01/08/2006 4:45 PM |
|-------------------------|--------------|--------------------|

Superscript

|                         |              |                    |
|-------------------------|--------------|--------------------|
| Page 16: [36] Formatted | Gavin.Barlow | 01/08/2006 4:35 PM |
|-------------------------|--------------|--------------------|

Space After: 0 pt, Line spacing: single

|                         |              |                    |
|-------------------------|--------------|--------------------|
| Page 16: [37] Formatted | Gavin.Barlow | 01/08/2006 4:35 PM |
|-------------------------|--------------|--------------------|

Space After: 0 pt, Line spacing: single

|                                         |              |                    |
|-----------------------------------------|--------------|--------------------|
| Page 16: [38] Formatted                 | Gavin.Barlow | 01/08/2006 4:35 PM |
| Space After: 0 pt, Line spacing: single |              |                    |
| Page 16: [39] Formatted                 | Gavin.Barlow | 01/08/2006 4:35 PM |
| Space After: 0 pt, Line spacing: single |              |                    |
| Page 16: [40] Formatted                 | Gavin.Barlow | 01/08/2006 4:35 PM |
| Space After: 0 pt, Line spacing: single |              |                    |
| Page 16: [41] Formatted                 | Gavin.Barlow | 01/08/2006 4:45 PM |
| Font: 9 pt                              |              |                    |
| Page 16: [42] Formatted                 | Gavin.Barlow | 01/08/2006 4:35 PM |
| Space After: 0 pt, Line spacing: single |              |                    |
| Page 16: [43] Formatted                 | Gavin.Barlow | 01/08/2006 4:45 PM |
| Font: 9 pt                              |              |                    |
| Page 16: [43] Formatted                 | Gavin.Barlow | 01/08/2006 4:45 PM |
| Superscript                             |              |                    |
| Page 16: [44] Formatted                 | Gavin.Barlow | 01/08/2006 4:35 PM |
| Space After: 0 pt, Line spacing: single |              |                    |
| Page 16: [45] Formatted                 | Gavin.Barlow | 01/08/2006 4:45 PM |
| Font: 9 pt                              |              |                    |
| Page 16: [46] Formatted                 | Gavin.Barlow | 01/08/2006 4:35 PM |
| Space After: 0 pt, Line spacing: single |              |                    |
| Page 16: [47] Formatted                 | Gavin.Barlow | 01/08/2006 4:45 PM |
| Font: 9 pt                              |              |                    |
| Page 16: [48] Formatted                 | Gavin.Barlow | 01/08/2006 4:35 PM |
| Space After: 0 pt, Line spacing: single |              |                    |
| Page 16: [49] Formatted                 | Gavin.Barlow | 01/08/2006 4:45 PM |
| Font: 9 pt                              |              |                    |
| Page 16: [50] Formatted                 | Gavin.Barlow | 01/08/2006 4:50 PM |
| Space After: 6 pt                       |              |                    |
| Page 16: [51] Deleted                   | Gavin.Barlow | 01/08/2006 3:49 PM |
| or 1                                    |              |                    |
| Page 16: [51] Deleted                   | Gavin.Barlow | 01/08/2006 4:38 PM |
| Page 16: [52] Formatted                 | Gavin.Barlow | 01/08/2006 4:45 PM |
| Font: 9 pt                              |              |                    |
| Page 16: [53] Formatted                 | Gavin.Barlow | 01/08/2006 4:45 PM |
| Font: 9 pt                              |              |                    |
| Page 16: [54] Formatted                 | Gavin.Barlow | 01/08/2006 4:45 PM |
| Font: 9 pt                              |              |                    |
| Page 16: [55] Formatted                 | Gavin.Barlow | 01/08/2006 4:45 PM |
| Font: 9 pt                              |              |                    |
| Page 16: [56] Formatted                 | Gavin.Barlow | 01/08/2006 4:45 PM |
| Font: 9 pt                              |              |                    |
| Page 16: [57] Formatted                 | Gavin.Barlow | 01/08/2006 4:45 PM |
| Font: 9 pt                              |              |                    |
| Page 16: [58] Formatted                 | Gavin.Barlow | 01/08/2006 4:45 PM |
| Font: 9 pt                              |              |                    |



|                                    |              |                    |
|------------------------------------|--------------|--------------------|
| Page 16: [59] Formatted            | Gavin.Barlow | 01/08/2006 4:45 PM |
| Font: 9 pt                         |              |                    |
| Page 16: [60] Formatted            | Gavin.Barlow | 01/08/2006 4:45 PM |
| Font: 9 pt                         |              |                    |
| Page 17: [61] Formatted            | Gavin.Barlow | 01/08/2006 5:00 PM |
| Right, Line spacing: single        |              |                    |
| Page 17: [62] Formatted            | Gavin.Barlow | 28/07/2006 4:13 PM |
| Font: Bold                         |              |                    |
| Page 17: [62] Formatted            | Gavin.Barlow | 28/07/2006 4:30 PM |
| Font: 10 pt, Bold, French (France) |              |                    |
| Page 17: [62] Formatted            | Gavin.Barlow | 28/07/2006 4:30 PM |
| French (France)                    |              |                    |
| Page 17: [63] Formatted            | Gavin.Barlow | 01/08/2006 5:00 PM |
| Left, Line spacing: single         |              |                    |
| Page 17: [64] Deleted              | Gavin.Barlow | 28/07/2006 4:29 PM |
|                                    |              |                    |
| Page 17: [65] Formatted            | Gavin.Barlow | 01/08/2006 5:00 PM |
| Line spacing: single               |              |                    |
| Page 17: [66] Formatted            | Gavin.Barlow | 01/08/2006 5:00 PM |
| Centered, Line spacing: single     |              |                    |
| Page 17: [67] Formatted            | Gavin.Barlow | 28/07/2006 4:12 PM |
| Font: 10 pt                        |              |                    |
| Page 17: [67] Formatted            | Gavin.Barlow | 28/07/2006 4:12 PM |
| Font: 10 pt                        |              |                    |
| Page 17: [67] Formatted            | Gavin.Barlow | 28/07/2006 4:12 PM |
| Font: 10 pt                        |              |                    |
| Page 17: [68] Formatted            | Gavin.Barlow | 01/08/2006 5:00 PM |
| Line spacing: single               |              |                    |
| Page 17: [69] Formatted            | Gavin.Barlow | 01/08/2006 5:00 PM |
| Centered, Line spacing: single     |              |                    |
| Page 17: [70] Formatted            | Gavin.Barlow | 28/07/2006 4:12 PM |
| Font: 10 pt                        |              |                    |
| Page 17: [70] Formatted            | Gavin.Barlow | 28/07/2006 4:12 PM |
| Font: 10 pt                        |              |                    |
| Page 17: [70] Formatted            | Gavin.Barlow | 28/07/2006 4:12 PM |
| Font: 10 pt                        |              |                    |
| Page 17: [71] Formatted            | Gavin.Barlow | 01/08/2006 5:00 PM |
| Line spacing: single               |              |                    |
| Page 17: [72] Formatted            | Gavin.Barlow | 01/08/2006 5:00 PM |
| Centered, Line spacing: single     |              |                    |
| Page 17: [73] Formatted            | Gavin.Barlow | 28/07/2006 4:12 PM |
| Font: 10 pt                        |              |                    |
| Page 17: [73] Formatted            | Gavin.Barlow | 28/07/2006 4:12 PM |
| Font: 10 pt                        |              |                    |

|                                                           |              |                    |
|-----------------------------------------------------------|--------------|--------------------|
| Page 17: [73] Formatted<br>Font: 10 pt                    | Gavin.Barlow | 28/07/2006 4:12 PM |
| Page 17: [74] Formatted<br>Line spacing: single           | Gavin.Barlow | 01/08/2006 5:00 PM |
| Page 17: [75] Formatted<br>Centered, Line spacing: single | Gavin.Barlow | 01/08/2006 5:00 PM |
| Page 17: [76] Formatted<br>Font: 10 pt                    | Gavin.Barlow | 28/07/2006 4:12 PM |
| Page 17: [76] Formatted<br>Font: 10 pt                    | Gavin.Barlow | 28/07/2006 4:12 PM |
| Page 17: [76] Formatted<br>Font: 10 pt                    | Gavin.Barlow | 28/07/2006 4:12 PM |
| Page 17: [77] Formatted<br>Line spacing: single           | Gavin.Barlow | 01/08/2006 5:00 PM |
| Page 17: [78] Formatted<br>Centered, Line spacing: single | Gavin.Barlow | 01/08/2006 5:00 PM |
| Page 17: [79] Formatted<br>Font: 10 pt                    | Gavin.Barlow | 28/07/2006 4:12 PM |
| Page 17: [79] Formatted<br>Font: 10 pt                    | Gavin.Barlow | 28/07/2006 4:12 PM |
| Page 17: [79] Formatted<br>Font: 10 pt                    | Gavin.Barlow | 28/07/2006 4:12 PM |
| Page 17: [80] Formatted<br>Line spacing: single           | Gavin.Barlow | 01/08/2006 5:00 PM |
| Page 17: [81] Formatted<br>Centered, Line spacing: single | Gavin.Barlow | 01/08/2006 5:00 PM |
| Page 17: [82] Formatted<br>Font: 10 pt                    | Gavin.Barlow | 28/07/2006 4:12 PM |
| Page 17: [82] Formatted<br>Font: 10 pt                    | Gavin.Barlow | 28/07/2006 4:12 PM |
| Page 17: [82] Formatted<br>Font: 10 pt                    | Gavin.Barlow | 28/07/2006 4:12 PM |
| Page 17: [83] Formatted<br>Font: 9 pt                     | Gavin.Barlow | 28/07/2006 4:37 PM |
| Page 17: [83] Formatted<br>Font: 9 pt                     | Gavin.Barlow | 28/07/2006 4:37 PM |
| Page 17: [83] Formatted<br>Font: 9 pt                     | Gavin.Barlow | 28/07/2006 4:37 PM |
| Page 17: [83] Formatted<br>Font: 9 pt                     | Gavin.Barlow | 28/07/2006 4:37 PM |
| Page 17: [83] Formatted<br>Font: 9 pt, Not Bold           | Gavin.Barlow | 28/07/2006 4:37 PM |
